# Supplementary material for: Serum Asprosin Correlates with Indirect Insulin Resistance Indices
Source: MDPI journal article supplement (doi:10.3390/biomedicines11061568), 2023-05-28
Supplement: s1 [file s1]

| Number | Gender | Age (years) | Asprosin (ng/ml) | Fasting plasma glucose (mmol/l) | Fasting plasma glucose (mg/dL) | TCHOL (mmol/L) | LDL (mmol/L) | HDL (mmol/L) | HDL (mg/dL) | TG (mmol/L) | TG (mg/dL) | Body height (cm) | Waist circumference (cm) | Neck circumference (cm) | Body mass (kg) | BMI      | WHtR     | NHtR     | TyG      | TG/HDL c | TyG- BMI | TyG-WC   | TyG-NC   | TyG- WHtR | TyG- NHtR | Obesity (1=yes, 0=no) | Hba1c (%) |
|--------|--------|-------------|------------------|---------------------------------|--------------------------------|----------------|--------------|--------------|-------------|-------------|------------|------------------|--------------------------|-------------------------|----------------|----------|----------|----------|----------|----------|----------|----------|----------|-----------|-----------|-----------------------|-----------|
| 1.     | F      | 73          | 113,44           | 4,2                             | 75,6                           | 4,33           | 2,57         | 1,31         | 50,6577     | 1,14        | 100,9698   | 167              | 112                      | 37                      | 85,7           | 30,72896 | 0,670659 | 0,221557 | 8,247131 | 0,870229 | 253,4258 | 923,6786 | 305,1438 | 5,53101   | 1,827209  | 1                     |           |
| 2.     | F      | 60          | 32,13            | 5,3                             | 95,4                           | 4,62           | 2,94         | 0,96         | 37,1232     | 2,77        | 245,3389   | 164              | 125                      | 41                      | 80,7           | 30,00446 | 0,762195 | 0,25     | 9,367572 | 2,885417 | 281,069  | 1170,946 | 384,0704 | 7,139918  | 2,341893  | 1                     | 4,6       |
| 3.     | M      | 31          | 81,85            | 5,6                             | 100,8                          | 4,68           | 3,5          | 0,9          | 34,803      | 2,47        | 218,7679   | 182              | 155                      | 48                      | 162,9          | 49,17884 | 0,851648 | 0,263736 | 9,308003 | 2,744444 | 457,7568 | 1442,74  | 446,7841 | 7,927145  | 2,454858  | 1                     |           |
| 4.     | F      | 55          | 101,33           | 4,9                             | 88,2                           | 3,66           | 2,54         | 0,78         | 30,1626     | 1,88        | 166,5116   | 163              | 113                      | 41                      | 92,2           | 34,7021  | 0,693252 | 0,251534 | 8,901525 | 2,410256 | 308,9016 | 1005,872 | 364,9625 | 6,170996  | 2,239034  | 1                     | 5,8       |
| 5.     | F      | 44          | 138,39           | 5,2                             | 93,6                           | 6,61           | 4,94         | 1,28         | 49,4976     | 1,22        | 108,0554   | 163              | 120                      | 41                      | 100,5          | 37,82604 | 0,736196 | 0,251534 | 8,528527 | 0,953125 | 322,6004 | 1023,423 | 349,6696 | 6,27867   | 2,145212  | 1                     |           |
| 6.     | M      | 34          | 46,18            | 5,7                             | 102,6                          | 5,46           | 3,93         | 1,08         | 41,7636     | 2,51        | 222,3107   | 175              | 129                      | 45                      | 128,5          | 41,95918 | 0,737143 | 0,257143 | 9,341767 | 2,324074 | 391,9729 | 1205,088 | 420,3795 | 6,886217  | 2,402169  | 1                     |           |
| 7.     | F      | 48          | 53,52            | 4,9                             | 88,2                           | 3,93           | 2,99         | 1,07         | 41,3769     | 0,97        | 85,9129    | 169              | 111                      | 40                      | 104,9          | 36,72841 | 0,656805 | 0,236686 | 8,239794 | 0,906542 | 302,6345 | 914,6171 | 329,5918 | 5,411936  | 1,950247  | 1                     | 5,6       |
| 8.     | F      | 54          | 5,91             | 5,6                             | 100,8                          | 2,54           | 1,16         | 0,83         | 32,0961     | 1,47        | 130,1979   | 160              | 73                       | 32,5                    | 55,8           | 21,79688 | 0,45625  | 0,203125 | 8,789047 | 1,771084 | 191,5738 | 641,6004 | 285,6444 | 4,010003  | 1,785275  | 0                     | 5,5       |
| 9.     | M      | 51          | 67,26            | 5,2                             | 93,6                           | 5,3            | 4,15         | 0,96         | 37,1232     | 1,7         | 150,569    | 177              | 153                      | 49                      | 149,1          | 47,59169 | 0,864407 | 0,276836 | 8,860305 | 1,770833 | 421,6769 | 1355,627 | 434,1549 | 7,658907  | 2,452853  | 1                     | 5,8       |
| 10.    | M      | 30          | 43,57            | 4,5                             | 81                             | 3,54           | 2,18         | 0,95         | 36,7365     | 1,44        | 127,5408   | 186              | 143                      | 41                      | 150,8          | 43,58885 | 0,768817 | 0,22043  | 8,549738 | 1,515789 | 372,6733 | 1222,613 | 350,5393 | 6,573186  | 1,88462   | 1                     | 5         |
| 11.    | M      | 37          | 488,37           | 5,2                             | 93,6                           | 5,17           | 3,4          | 1,03         | 39,8        | 2,93        | 259,12     | 174              | 170                      | 57                      | 211,8          | 69,9564  | 0,977011 | 0,327586 | 9,403174 | 2,84466  | 657,8122 | 1598,54  | 535,9809 | 9,18701   | 3,08035   | 1                     | 5,7       |
| 12.    | M      | 45          | 52,28            | 6,4                             | 115,2                          | 4,63           | 3,8          | 1,14         | 44,0838     | 1,28        | 113,3696   | 187              | 162                      | 48,5                    | 168,2          | 48,09975 | 0,86631  | 0,259358 | 8,784176 | 1,122807 | 422,5166 | 1423,036 | 426,0325 | 7,609821  | 2,278249  | 1                     | 5,9       |
| 13.    | M      | 43          | 20,96            | 5,1                             | 91,8                           | 5,97           | 4,61         | 1,11         | 42,9237     | 2,43        | 215,2251   | 184              | 95                       | 39                      | 87,9           | 25,9629  | 0,516304 | 0,211957 | 9,19815  | 2,189189 | 238,8107 | 873,8242 | 358,7278 | 4,749045  | 1,949608  | 0                     | 5,1       |
| 14.    | M      | 30          | 6,11             | 4,9                             | 88,2                           | 5,59           | 4,11         | 1,42         | 54,9114     | 1,31        | 116,0267   | 171              | 100                      | 40                      | 80             | 27,35885 | 0,584795 | 0,233918 | 8,54028  | 0,922535 | 233,6522 | 854,028  | 341,6112 | 4,994316  | 1,997726  | 0                     | 5,4       |
| 15.    | M      | 23          | 20,48            | 5,2                             | 93,6                           | 4,14           | 3,32         | 0,91         | 35,1897     | 1,5         | 132,855    | 188              | 107                      | 41                      | 104,7          | 29,62313 | 0,569149 | 0,218085 | 8,735142 | 1,648352 | 258,7623 | 934,6601 | 358,1408 | 4,971596  | 1,905004  | 0                     | 4,9       |
| 16.    | F      | 59          | 71,47            | 5,9                             | 106,2                          | 6,95           | 3,15         | 1,25         | 48,3375     | 5,11        | 452,5927   | 164              | 99                       | 40                      | 87,7           | 32,60708 | 0,603659 | 0,243902 | 10,08717 | 4,088    | 328,9131 | 998,6298 | 403,4868 | 6,089206  | 2,460285  | 1                     | 6         |
| 17.    | M      | 40          | 55,54            | 5,7                             | 102,6                          | 4,5            | 2,9          | 1,27         | 49,1109     | 0,78        | 69,0846    | 170              | 136                      | 44                      | 129,3          | 44,74048 | 0,8      | 0,258824 | 8,173023 | 0,614173 | 365,665  | 1111,531 | 359,613  | 6,538418  | 2,115371  | 1                     | 5,7       |
| 18.    | F      | 32          | 274,68           | 5,2                             | 93,6                           | 4,27           | 2,71         | 1,03         | 39,8301     | 2,24        | 198,3968   | 167              | 130                      | 44                      | 175,2          | 62,82047 | 0,778443 | 0,263473 | 9,136152 | 2,174757 | 573,9374 | 1187,7   | 401,9907 | 7,111975  | 2,40713   | 1                     | 5,9       |
| 19.    | F      | 57          | 69,2             | 5,4                             | 97,2                           | 3,78           | 1,75         | 1,65         | 63,8055     | 0,86        | 76,1702    | 167              | 97                       | 38                      | 97,2           | 34,85245 | 0,580838 | 0,227545 | 8,216594 | 0,521212 | 286,3684 | 797,0096 | 312,2306 | 4,772513  | 1,869644  | 1                     |           |
| 20.    | F      | 41          | 57,85            | 4,9                             | 88,2                           | 4,12           | 1,87         | 2,1          | 81,207      | 0,93        | 82,3701    | 170              | 89                       | 31                      | 74,1           | 25,64014 | 0,523529 | 0,182353 | 8,197682 | 0,442857 | 210,1897 | 729,5937 | 254,1282 | 4,291728  | 1,494871  | 0                     | 5,7       |
| 21.    | F      | 75          | 13,84            | 4,4                             | 79,2                           | 5,31           | 3,34         | 1,48         | 57,2316     | 1,31        | 116,0267   | 164              | 79                       | 31                      | 53,3           | 19,81707 | 0,481707 | 0,189024 | 8,432649 | 0,885135 | 167,1104 | 666,1793 | 261,4121 | 4,062069  | 1,593976  | 0                     | 6,5       |
| 22.    | F      | 41          | 81,54            | 5,4                             | 97,2                           | 4,13           | 2,78         | 0,92         | 35,5764     | 1,86        | 164,7402   | 171              | 89                       | 37                      | 76             | 25,9909  | 0,520468 | 0,216374 | 8,987993 | 2,021739 | 233,6061 | 799,9314 | 332,5557 | 4,677961  | 1,94477   | 0                     | 5,4       |
| 23.    | M      | 45          | 136,69           | 5,4                             | 97,2                           | 4,87           | 3,5          | 0,84         | 32,4828     | 2,26        | 200,1682   | 178              | 152                      | 57                      | 163,9          | 51,72958 | 0,853933 | 0,320225 | 9,182782 | 2,690476 | 475,0214 | 1395,783 | 523,4185 | 7,841476  | 2,940554  | 1                     | 5,8       |
| 24.    | M      | 64          | 20,48            | 5,4                             | 97,2                           | 2,57           | 1,26         | 0,75         | 29,0025     | 3,04        | 269,2528   | 176              | 112                      | 39                      | 88,7           | 28,63507 | 0,636364 | 0,221591 | 9,479274 | 4,053333 | 271,4397 | 1061,679 | 369,6917 | 6,032265  | 2,100521  | 0                     | 6,2       |
| 25.    | F      | 35          | 15,84            | 4,9                             | 88,2                           | 4,15           | 2,8          | 1,09         | 42,1503     | 1,22        | 108,0554   | 165              | 88                       | 30                      | 78,7           | 28,90725 | 0,533333 | 0,181818 | 8,469104 | 1,119266 | 244,8185 | 745,2811 | 254,0731 | 4,516855  | 1,539837  | 0                     | 5         |
| 26.    | F      | 45          | 129,91           | 6                               | 108                            | 6,23           | 4,59         | 1,61         | 62,2587     | 1,89        | 167,3973   | 163              | 110                      | 38                      | 102,2          | 38,46588 | 0,674847 | 0,233129 | 9,109354 | 1,173913 | 350,3993 | 1002,029 | 346,1555 | 6,147471  | 2,123653  | 1                     | 5,5       |
| 27.    | M      | 43          | 19,26            | 5,6                             | 100,8                          | 6,45           | 2,22         | 1,22         | 47,1774     | 5,56        | 492,4492   | 187              | 108                      | 42                      | 105,5          | 30,16958 | 0,57754  | 0,224599 | 10,11938 | 4,557377 | 305,2975 | 1092,893 | 425,0141 | 5,844349  | 2,272802  | 1                     | 5         |
| 28.    | F      | 54          | 80,93            | 11,1                            | 199,8                          | 4,54           | 2,93         | 1,26         | 48,7242     | 1,67        | 147,9119   | 167              | 108                      | 34                      | 103,4          | 37,07555 | 0,646707 | 0,203593 | 9,600787 | 1,325397 | 355,9544 | 1036,885 | 326,4267 | 6,208892  | 1,954651  | 1                     | 7,2       |
| 29.    | M      | 40          | 11,86            | 6,6                             | 118,8                          | 4,07           | 2,77         | 0,85         | 32,8695     | 2,86        | 253,3102   | 182              | 114                      | 43                      | 114,6          | 34,59727 | 0,626374 | 0,236264 | 9,618909 | 3,364706 | 332,788  | 1096,556 | 413,6131 | 6,025031  | 2,272599  | 1                     | 5,4       |
| 30.    | F      | 48          | 48,28            | 6                               | 108                            | 5,32           | 3,87         | 1,28         | 49,4976     | 1,44        | 127,5408   | 168              | 132                      | 43                      | 144,5          | 51,19756 | 0,785714 | 0,255952 | 8,83742  | 1,125    | 452,4544 | 1166,539 | 380,0091 | 6,943687  | 2,261959  | 1                     | 5,7       |
| 31.    | M      | 31          | 38,6             | 6,1                             | 109,8                          | 4,46           | 3,49         | 1,11         | 42,9237     | 0,97        | 85,9129    | 182              | 139                      | 45                      | 146,2          | 44,13718 | 0,763736 | 0,247253 | 8,458847 | 0,87387  | 373,3497 | 1175,78  | 380,6481 | 6,460328  | 2,091473  | 1                     | 5,6       |
| 32.    | F      | 51          | 88,35            | 5,5                             | 99                             | 5,08           | 3,7          | 1,21         | 46,7907     | 1,97        | 174,4829   | 174              | 123                      | 35                      | 99,7           | 32,93037 | 0,706897 | 0,201149 | 9,063799 | 1,628099 | 298,4743 | 1114,847 | 317,233  | 6,407169  | 1,823178  | 1                     | 5,5       |

|     |   |    |        |              |       |         |         |         |              |         |              |       |       |      |       |              |              |              |              |              |              |              |              |              |              |   |     |
|-----|---|----|--------|--------------|-------|---------|---------|---------|--------------|---------|--------------|-------|-------|------|-------|--------------|--------------|--------------|--------------|--------------|--------------|--------------|--------------|--------------|--------------|---|-----|
| 33. | M | 45 | 49,92  | 6,4          | 115,2 | 4,75    | 2,93    | 1,42    | 54,9114      | 0,89    | 78,8273      | 187   | 157   | 48   | 160   | 45,7548<br>1 | 0,83957<br>2 | 0,25668<br>4 | 8,42078<br>2 | 0,62676<br>1 | 385,291<br>3 | 1322,06<br>3 | 404,197<br>5 | 7,06985<br>4 | 2,16148<br>4 | 1 | 5,7 |
| 34. | M | 31 | 3,61   | 4,9          | 88,2  | 3,83    | 2,3     | 1,46    | 56,4582      | 0,76    | 67,3132      | 171   | 91    | 38   | 75,3  | 25,7515<br>1 | 0,53216<br>4 | 0,22222<br>2 | 7,99581<br>6 | 0,52054<br>8 | 205,904<br>4 | 727,619<br>3 | 303,841      | 4,25508<br>3 | 1,77684<br>8 | 0 | 5,4 |
| 35. | F | 67 | 30,94  | 5,61111<br>1 | 101   | 6,15468 | 2,3274  | 2,92218 | 113,000<br>7 | 1,97575 | 174,992<br>2 | 168   | 81    | 34   | 69    | 24,4472<br>8 | 0,48214<br>3 | 0,20238<br>1 | 9,08671<br>5 | 0,67612<br>2 | 222,145<br>4 | 736,023<br>9 | 308,948<br>3 | 4,38109<br>5 | 1,83897<br>8 | 0 |     |
| 36. | F | 74 | 48,52  | 4,72222<br>2 | 85    | 3,56868 | 1,21542 | 1,78434 | 69,0004<br>3 | 1,29835 | 114,994<br>9 | 162   | 96    | 39   | 79    | 30,1021<br>2 | 0,59259<br>3 | 0,24074<br>1 | 8,49439<br>2 | 0,72763<br>6 | 255,699<br>2 | 815,461<br>6 | 331,281<br>3 | 5,03371<br>3 | 2,04494<br>6 | 1 |     |
| 37. | F | 66 | 47,37  | 4,33333<br>3 | 78    | 6,465   | 3,64626 | 1,75848 | 68,0004<br>2 | 2,29187 | 202,990<br>9 | 155   | 97    | 40   | 82    | 34,1311<br>1 | 0,62580<br>6 | 0,25806<br>5 | 8,97672<br>3 | 1,30332<br>4 | 306,385<br>5 | 870,742<br>1 | 359,068<br>9 | 5,61769<br>1 | 2,31657<br>4 | 1 |     |
| 38. | M | 61 | 11,19  | 6,61111<br>1 | 119   | 5,76678 | 3,05148 | 0,93096 | 36,0002<br>2 | 3,84989 | 340,984<br>8 | 170   | 120   | 41   | 105   | 36,3321<br>8 | 0,70588<br>2 | 0,24117<br>6 | 9,91781<br>4 | 4,13539<br>8 | 360,335<br>8 | 1190,13<br>8 | 406,630<br>4 | 7,00081      | 2,39194<br>3 | 1 |     |
| 39. | F | 43 | 3,71   | 5,55555<br>6 | 100   | 4,18932 | 1,9395  | 1,83606 | 71,0004<br>4 | 0,93707 | 82,9962<br>9 | 167   | 68    | 30   | 51,5  | 18,4660<br>6 | 0,40718<br>6 | 0,17964<br>1 | 8,33081<br>9 | 0,51037<br>9 | 153,837<br>4 | 566,495<br>7 | 249,924<br>6 | 3,39219      | 1,49655<br>4 | 0 |     |
| 40. | F | 66 | 29,58  | 4,77777<br>8 | 86    | 7,00806 | 3,7497  | 1,9395  | 75,0004<br>7 | 2,90153 | 256,988<br>5 | 164   | 91    | 32   | 72,85 | 27,0858<br>1 | 0,55487<br>8 | 0,19512<br>2 | 9,31023<br>1 | 1,49602      | 252,175<br>2 | 847,231<br>1 | 297,927<br>4 | 5,16604<br>3 | 1,81663<br>1 | 0 |     |
| 41. | M | 60 | 9,29   | 4,44444<br>4 | 80    | 3,98244 | 2,22396 | 1,39644 | 54,0003<br>3 | 0,83546 | 73,9966<br>9 | 164   | 110   | 42   | 85    | 31,6032<br>1 | 0,67073<br>2 | 0,25609<br>8 | 7,9929       | 0,59827<br>8 | 252,601<br>3 | 879,219      | 335,701<br>8 | 5,36109<br>1 | 2,04696<br>2 | 1 |     |
| 42. | F | 77 | 21,29  | 5,16666<br>7 | 93    | 5,09442 | 2,74116 | 1,73262 | 67,0004<br>2 | 1,33222 | 117,994<br>7 | 154   | 90    | 34   | 72    | 30,3592<br>5 | 0,58441<br>6 | 0,22077<br>9 | 8,61009<br>2 | 0,76890<br>5 | 261,396      | 774,908<br>3 | 292,743<br>1 | 5,03187<br>2 | 1,90092<br>9 | 1 |     |
| 43. | F | 49 | 21,58  | 4,77777<br>8 | 86    | 7,55112 | 4,49964 | 1,75848 | 68,0004<br>2 | 2,8225  | 249,988<br>8 | 152   | 104,5 | 37   | 74,4  | 32,2022<br>2 | 0,6875       | 0,24342<br>1 | 9,28261<br>6 | 1,60507<br>9 | 298,920<br>8 | 970,033<br>4 | 343,456<br>8 | 6,38179<br>9 | 2,25958<br>4 | 1 |     |
| 44. | F | 67 | 140,13 | 5,11111<br>1 | 92    | 7,83558 | 4,93926 | 1,57746 | 61,0003<br>8 | 2,87895 | 254,988<br>6 | 167   | 98    | 35,5 | 91,2  | 32,7010<br>6 | 0,58682<br>6 | 0,21257<br>5 | 9,36986      | 1,82505<br>4 | 306,404<br>4 | 918,246<br>3 | 332,63       | 5,49848<br>1 | 1,99179<br>7 | 1 |     |
| 45. | F | 35 | 11,28  | 4,22222<br>2 | 76    | 5,01684 | 2,09466 | 2,30154 | 89,0005<br>5 | 1,32093 | 116,994<br>8 | 163   | 75,5  | 31,5 | 60    | 22,5827<br>1 | 0,46319      | 0,19325<br>2 | 8,39971<br>5 | 0,57393<br>3 | 189,688<br>3 | 634,178<br>5 | 264,591      | 3,89066<br>6 | 1,62325<br>8 | 0 |     |
| 46. | F | 60 | 11,39  | 3,55555<br>6 | 64    | 8,17176 | 5,14614 | 1,39644 | 54,0003<br>3 | 3,54506 | 313,986      | 160   | 78    | 32   | 59    | 23,0468<br>8 | 0,4875       | 0,2          | 9,21508<br>4 | 2,53864<br>1 | 212,378<br>9 | 718,776<br>6 | 294,882<br>7 | 4,49235<br>4 | 1,84301<br>7 | 0 |     |
| 47. | M | 39 | 6,73   | 5,5          | 99    | 5,09442 | 2,53428 | 1,26714 | 49,0003      | 2,78863 | 246,989      | 187   | 109   | 45   | 116,1 | 33,2008<br>4 | 0,58288<br>8 | 0,24064<br>2 | 9,41131<br>6 | 2,20072<br>8 | 312,463<br>6 | 1025,83<br>3 | 423,509<br>2 | 5,48574<br>1 | 2,26475<br>5 | 1 |     |
| 48. | F | 60 | 12,61  | 4,27777<br>8 | 77    | 4,9134  | 2,99976 | 1,62918 | 63,0003<br>9 | 0,62095 | 54,9975<br>4 | 169   | 79    | 33   | 66    | 23,1084<br>3 | 0,46745<br>6 | 0,19526<br>6 | 7,65794<br>7 | 0,38114<br>3 | 176,963<br>2 | 604,977<br>8 | 252,712<br>2 | 3,57975      | 1,49533<br>9 | 0 |     |
| 49. | F | 67 | 30,81  | 4,83333<br>3 | 87    | 4,9134  | 1,91364 | 1,83606 | 71,0004<br>4 | 2,52896 | 223,99       | 154   | 89,5  | 32   | 75,3  | 31,7507<br>2 | 0,58116<br>9 | 0,20779<br>2 | 9,18436<br>2 | 1,37738<br>4 | 291,610<br>1 | 822,000<br>4 | 293,899<br>6 | 5,33766<br>5 | 1,90843<br>9 | 1 |     |
| 50. | F | 77 | 41,76  | 4,5          | 81    | 5,32716 | 2,61186 | 1,99122 | 77,0004<br>8 | 1,55802 | 137,993<br>8 | 150   | 95    | 33   | 71,4  | 31,7333<br>3 | 0,63333<br>3 | 0,22         | 8,62851<br>1 | 0,78244<br>5 | 273,811<br>4 | 819,708<br>5 | 284,740<br>9 | 5,46472<br>4 | 1,89827<br>2 | 1 |     |
| 51. | F | 78 | 15,93  | 6,38888<br>9 | 115   | 5,87022 | 3,20664 | 1,39644 | 54,0003<br>3 | 2,74347 | 242,989<br>1 | 158   | 103,5 | 33,5 | 78,7  | 31,5254      | 0,65506<br>3 | 0,21202<br>5 | 9,54480<br>2 | 1,96461<br>7 | 300,903<br>7 | 987,887      | 319,750<br>9 | 6,25244<br>9 | 2,02374      | 1 |     |
| 52. | M | 51 | 9,54   | 4,66666<br>7 | 84    | 4,9134  | 2,24982 | 1,49988 | 58,0003<br>6 | 2,51767 | 222,99       | 182   | 109   | 38   | 92    | 27,7744<br>2 | 0,59890<br>1 | 0,20879<br>1 | 9,14479<br>7 | 1,67858<br>1 | 253,991<br>5 | 996,782<br>8 | 347,502<br>3 | 5,47682<br>9 | 1,90935<br>3 | 0 |     |
| 53. | M | 63 | 9,83   | 4,61111<br>1 | 83    | 3,56868 | 1,21542 | 1,78434 | 69,0004<br>3 | 1,29835 | 114,994<br>9 | 180   | 106,5 | 40   | 94,1  | 29,0432<br>1 | 0,59166<br>7 | 0,22222<br>2 | 8,47058<br>1 | 0,72763<br>6 | 246,012<br>9 | 902,116<br>9 | 338,823<br>2 | 5,01176      | 1,88235<br>1 | 0 |     |
| 54. | F | 62 | 24,69  | 6,16666<br>7 | 111   | 4,73238 | 2,09466 | 2,30154 | 89,0005<br>5 | 0,71127 | 62,9971<br>8 | 163   | 93    | 37   | 73,7  | 27,7390<br>9 | 0,57055<br>2 | 0,22699<br>4 | 8,15947<br>3 | 0,30904<br>1 | 226,336<br>4 | 758,831      | 301,900<br>5 | 4,65540<br>5 | 1,85215      | 0 |     |
| 55. | F | 32 | 19,89  | 5,38888<br>9 | 97    | 3,77556 | 1,34472 | 1,39644 | 54,0003<br>3 | 2,24671 | 198,991<br>1 | 169   | 84    | 34   | 69,5  | 24,3338<br>8 | 0,49704<br>1 | 0,20118<br>3 | 9,17482<br>4 | 1,60888<br>4 | 223,259<br>1 | 770,685<br>2 | 311,944      | 4,56026<br>8 | 1,84582<br>3 | 0 |     |
| 56. | M | 61 | 9,43   | 8,5          | 153   | 5,5599  | 2,89    | 1,08612 | 42,0002<br>6 | 6,22079 | 550,975<br>4 | 181   | 98    | 39   | 95    | 28,9978<br>9 | 0,54143<br>6 | 0,21547      | 10,6489<br>8 | 5,72753<br>5 | 308,798      | 1043,6       | 415,310<br>3 | 5,76574<br>7 | 2,29453<br>2 | 0 |     |
| 57. | F | 60 | 33,77  | 5,33333<br>3 | 96    | 7,31838 | 4,47378 | 1,49988 | 58,0003<br>6 | 2,9354  | 259,988<br>4 | 149   | 87,5  | 32,5 | 63,9  | 28,7824<br>9 | 0,58724<br>8 | 0,21812<br>1 | 9,43183<br>8 | 1,95709      | 271,471<br>8 | 825,285<br>8 | 306,534<br>7 | 5,53883<br>1 | 2,05728      | 0 |     |
| 58. | M | 78 | 25,12  | 7,22222<br>2 | 130   | 4,96512 | 2,14638 | 1,70676 | 66,0004<br>1 | 2,44993 | 216,990<br>3 | 164,5 | 107   | 40,5 | 92,6  | 34,2199<br>4 | 0,65045<br>6 | 0,24620<br>1 | 9,55424      | 1,43542<br>7 | 326,945<br>5 | 1022,30<br>4 | 386,946<br>7 | 6,21461<br>2 | 2,35226      | 1 |     |
| 59. | M | 64 | 26,77  | 6,72222<br>2 | 121   | 2,99976 | 1,34472 | 1,11198 | 43,0002<br>7 | 1,18545 | 104,995<br>3 | 171,5 | 120   | 49   | 104,2 | 35,4274<br>2 | 0,69970<br>8 | 0,28571<br>4 | 8,75655<br>9 | 1,06607<br>1 | 310,222<br>3 | 1050,78<br>7 | 429,071<br>4 | 6,12703<br>8 | 2,50187<br>4 | 1 |     |
| 60. | F | 65 | 46,61  | 5,44444<br>4 | 98    | 4,5255  | 0       | 1,08612 | 42,0002<br>6 | 4,34665 | 384,982<br>8 | 152   | 126   | 44   | 105   | 45,4466<br>8 | 0,82894<br>7 | 0,28947<br>4 | 9,84501<br>9 | 4,00199<br>8 | 447,423<br>4 | 1240,47<br>2 | 433,180<br>3 | 8,16100<br>3 | 2,84987<br>4 | 1 |     |
| 61. | F | 73 | 77,17  | 7,44444<br>4 | 134   | 5,3013  | 0       | 1,70676 | 66,0004<br>1 | 5,06921 | 448,979<br>9 | 152,5 | 90    | 36   | 75,05 | 32,2708<br>9 | 0,59016<br>4 | 0,23606<br>6 | 10,3116<br>7 | 2,97007<br>8 | 332,766<br>8 | 928,050<br>4 | 371,220<br>1 | 6,08557<br>6 | 2,43423      | 1 |     |
| 62. | F | 62 | 10,91  | 4,72222<br>2 | 85    | 5,8185  | 2,89632 | 2,48256 | 96,0006      | 0,94836 | 83,9962<br>5 | 149,5 | 85    | 33   | 57,2  | 25,5925<br>5 | 0,56856<br>2 | 0,22073<br>6 | 8,18027<br>6 | 0,38200<br>9 | 209,354<br>2 | 695,323<br>5 | 269,949<br>1 | 4,65099<br>3 | 1,80568      | 0 |     |
| 63. | F | 68 | 84,35  | 4,72222<br>2 | 85    | 4,49964 | 1,4223  | 1,44816 | 56,0003<br>5 | 3,55635 | 314,985<br>9 | 162,5 | 106   | 37   | 83    | 31,4319<br>5 | 0,65230<br>8 | 0,22769<br>2 | 9,50203<br>2 | 2,45577<br>1 | 298,667<br>4 | 1007,21<br>5 | 351,575<br>2 | 6,19824<br>9 | 2,16354      | 1 |     |
| 64. | M | 65 | 9,5    | 4,83333<br>3 | 87    | 5,58576 | 3,1032  | 1,52574 | 59,0003<br>7 | 2,06607 | 182,991<br>8 | 164   | 96    | 40   | 70,6  | 26,2492<br>6 | 0,58536<br>6 | 0,24390<br>2 | 8,98220<br>2 | 1,35414<br>3 | 235,776<br>1 | 862,291<br>4 | 359,288<br>1 | 5,25787<br>5 | 2,19078<br>1 | 0 |     |
| 65. | F | 62 | 50,78  | 5,61111<br>1 | 101   | 6,05124 | 3,72384 | 1,4223  | 55,0003<br>4 | 1,96446 | 173,992<br>2 | 160   | 99    | 35   | 75    | 29,2968<br>8 | 0,61875      | 0,21875      | 9,08098<br>4 | 1,38118<br>5 | 266,044<br>5 | 899,017<br>4 | 317,834<br>4 | 5,61885<br>9 | 1,98646<br>5 | 0 |     |
| 66. | F | 51 | 16,55  | 4,22222<br>2 | 76    | 5,01684 | 1,75848 | 2,81874 | 109,000<br>7 | 0,97094 | 85,9961<br>6 | 152   | 71    | 34   | 50,8  | 21,9875<br>3 | 0,46710<br>5 | 0,22368<br>4 | 8,09188<br>9 | 0,34445<br>9 | 177,920<br>7 | 574,524<br>1 | 275,124<br>2 | 3,77976<br>4 | 1,81002<br>8 | 0 |     |
| 67. | M | 62 | 6,34   | 7,5          | 135   | 2,66358 | 0,5172  | 0,72408 | 28,0001<br>7 | 3,10475 | 274,987<br>7 | 167   | 108   | 42   | 87,4  | 31,3385<br>2 | 0,64670<br>7 | 0,25149<br>7 | 9,82885<br>4 | 4,28785<br>5 | 308,021<br>7 | 1061,51<br>6 | 412,811<br>9 | 6,35638<br>5 | 2,47192<br>7 | 1 |     |

|      |   |    |       |              |       |         |         |         |              |         |              |     |     |    |       |              |              |              |              |              |              |              |              |              |              |   |
|------|---|----|-------|--------------|-------|---------|---------|---------|--------------|---------|--------------|-----|-----|----|-------|--------------|--------------|--------------|--------------|--------------|--------------|--------------|--------------|--------------|--------------|---|
| 68.  | M | 62 | 12,33 | 4,83333<br>3 | 87    | 5,6892  | 3,41352 | 1,70676 | 66,0004<br>1 | 1,25319 | 110,995      | 173 | 112 | 45 | 91,15 | 30,4554<br>1 | 0,64739<br>9 | 0,26011<br>6 | 8,48224<br>6 | 0,73425<br>1 | 258,330<br>3 | 950,011<br>6 | 381,701<br>1 | 5,49139<br>7 | 2,20636<br>5 | 1 |
| 69.  | F | 56 | 93,58 | 5,33333<br>3 | 96    | 3,95658 | 1,65504 | 1,37058 | 53,0003<br>3 | 1,86285 | 164,992<br>6 | 169 | 130 | 44 | 110,4 | 38,6541<br>1 | 0,76923<br>1 | 0,26035<br>5 | 8,97710<br>2 | 1,35916<br>9 | 347,001<br>9 | 1167,02<br>3 | 394,992<br>5 | 6,90546<br>3 | 2,33723<br>4 | 1 |
| 70.  | F | 55 | 5,54  | 4,55555<br>6 | 82    | 6,62016 | 3,46524 | 2,87046 | 111,000<br>7 | 0,64353 | 56,9974<br>5 | 166 | 77  | 35 | 64,3  | 23,3343      | 0,46385<br>5 | 0,21084<br>3 | 7,75657<br>9 | 0,22419<br>1 | 180,994<br>3 | 597,256<br>6 | 271,480<br>3 | 3,59793<br>1 | 1,63542<br>3 | 0 |
| 71.  | M | 63 | 8,51  | 4,83333<br>3 | 87    | 4,42206 | 2,61186 | 1,37058 | 53,0003<br>3 | 0,97094 | 85,9961<br>6 | 177 | 107 | 42 | 92,4  | 29,4934<br>4 | 0,60452      | 0,23728<br>8 | 8,22706<br>4 | 0,70841<br>5 | 242,644<br>4 | 880,295<br>8 | 345,536<br>7 | 4,97342<br>3 | 1,95218<br>5 | 0 |
| 72.  | M | 66 | 7,85  | 5,61111<br>1 | 101   | 4,42206 | 2,37912 | 1,75848 | 68,0004<br>2 | 0,63224 | 55,9975      | 180 | 86  | 36 | 78,9  | 24,3518<br>5 | 0,47777<br>8 | 0,2          | 7,94728      | 0,35953<br>8 | 193,531      | 683,466<br>1 | 286,102<br>1 | 3,79703<br>4 | 1,58945<br>6 | 0 |
| 73.  | F | 41 | 39,53 | 4,16666<br>7 | 75    | 5,12028 | 2,89632 | 1,24128 | 48,0003      | 2,13381 | 188,991<br>6 | 154 | 99  | 94 | 72,5  | 30,5700<br>8 | 0,64285<br>7 | 0,61039      | 8,86604<br>3 | 1,71904      | 271,035<br>6 | 877,738<br>3 | 833,408<br>1 | 5,69959<br>9 | 5,41174<br>1 | 1 |
| 74.  | M | 67 | 1,98  | 4,41         | 79,38 | 4,1376  | 1,83606 | 1,9395  | 75,0004<br>7 | 0,7903  | 69,9968<br>7 | 180 | 83  | 39 | 69    | 21,2963      | 0,46111<br>1 | 0,21666<br>7 | 7,92955      | 0,40747<br>6 | 168,87       | 658,152<br>6 | 309,252<br>4 | 3,65640<br>4 | 1,71806<br>9 | 0 |
| 75.  | F | 59 | 14,75 | 4,5          | 81    | 6,10296 | 3,43938 | 1,83606 | 71,0004<br>4 | 1,85156 | 163,992<br>7 | 154 | 84  | 36 | 59    | 24,8777<br>2 | 0,54545<br>5 | 0,23376<br>6 | 8,80112<br>4 | 1,00844<br>2 | 218,951<br>9 | 739,294<br>4 | 316,840<br>5 | 4,80061<br>3 | 2,05740<br>6 | 0 |
| 76.  | F | 63 | 26,6  | 6,16666<br>7 | 111   | 4,37034 | 1,99122 | 0,9051  | 35,0002<br>2 | 3,26281 | 288,987<br>1 | 170 | 98  | 40 | 82    | 28,3737      | 0,57647<br>1 | 0,23529<br>4 | 9,68276<br>5 | 3,60491<br>7 | 274,735      | 948,911      | 387,310<br>6 | 5,58182<br>9 | 2,27829<br>8 | 0 |
| 77.  | M | 68 | 8,74  | 6,55555<br>6 | 118   | 5,06856 | 2,53    | 1,21542 | 47,0002<br>9 | 4,7418  | 419,981<br>2 | 173 | 102 | 39 | 83    | 27,7323      | 0,58959<br>5 | 0,22543<br>4 | 10,1177<br>5 | 3,90136<br>7 | 280,588<br>4 | 1032,01      | 394,592<br>2 | 5,96537<br>7 | 2,28087<br>9 | 0 |
| 78.  | F | 79 | 18,82 | 1,77777<br>8 | 32    | 3,25836 | 1,44816 | 1,57746 | 61,0003<br>8 | 0,54192 | 47,9978<br>5 | 159 | 95  | 38 | 67,3  | 26,6207<br>8 | 0,59748<br>4 | 0,23899<br>4 | 6,64374<br>5 | 0,34354      | 176,861<br>7 | 631,155<br>8 | 252,462<br>3 | 3,96953<br>3 | 1,58781<br>3 | 0 |
| 79.  | M | 85 | 7,8   | 5,44444<br>4 | 98    | 4,37034 | 2,56014 | 1,52574 | 59,0003<br>7 | 0,58708 | 51,9976<br>8 | 183 | 101 | 39 | 77,5  | 23,1419<br>3 | 0,55191<br>3 | 0,21311<br>5 | 7,84301<br>9 | 0,38478<br>4 | 181,502<br>6 | 792,145      | 305,877<br>8 | 4,32866<br>1 | 1,67146<br>3 | 0 |
| 80.  | F | 68 | 50,47 | 5,33333<br>3 | 96    | 5,06856 | 2,68944 | 1,65504 | 64,0004      | 1,5806  | 139,993<br>7 | 164 | 99  | 38 | 88,5  | 32,9045<br>2 | 0,60365<br>9 | 0,23170<br>7 | 8,81279<br>9 | 0,95502<br>2 | 289,980<br>9 | 872,467<br>1 | 334,886<br>4 | 5,31992<br>1 | 2,04199      | 1 |
| 81.  | F | 60 | 38,49 | 9,11111<br>1 | 164   | 5,5599  | 2,89    | 1,08612 | 42,0002<br>6 | 6,22079 | 550,975<br>4 | 165 | 117 | 42 | 107   | 39,3021<br>1 | 0,70909<br>1 | 0,25454<br>5 | 10,7184<br>1 | 5,72753<br>5 | 421,256<br>1 | 1254,05<br>4 | 450,173<br>2 | 7,60032<br>7 | 2,72832<br>2 | 1 |
| 82.  | F | 67 | 23,3  | 5,66666<br>7 | 102   | 4,37034 | 2,17224 | 1,83606 | 71,0004<br>4 | 0,80159 | 70,9968<br>3 | 172 | 99  | 35 | 85    | 28,7317<br>5 | 0,57558<br>1 | 0,20348<br>8 | 8,19446<br>1 | 0,43658<br>2 | 235,441<br>2 | 811,251<br>6 | 286,806<br>1 | 4,71657<br>9 | 1,66747<br>7 | 0 |
| 83.  | M | 64 | 4,18  | 4,77777<br>8 | 86    | 6,02538 | 3,4911  | 1,293   | 50,0003<br>1 | 2,74347 | 242,989<br>1 | 172 | 94  | 38 | 74,5  | 25,1825<br>3 | 0,54651<br>2 | 0,22093      | 9,25421<br>7 | 2,12178<br>7 | 233,044<br>6 | 869,896<br>4 | 351,660<br>2 | 5,05753<br>7 | 2,04453<br>6 | 0 |
| 84.  | M | 42 | 10,49 | 4,72222<br>2 | 85    | 5,48232 | 9,051   | 1,13784 | 44,0002<br>7 | 5,36275 | 474,978<br>8 | 178 | 105 | 44 | 93    | 29,3523<br>5 | 0,58988<br>8 | 0,24719<br>1 | 9,91277<br>4 | 4,71309<br>7 | 290,963<br>3 | 1040,84<br>1 | 436,162<br>1 | 5,84742<br>3 | 2,45034<br>9 | 0 |
| 85.  | F | 33 | 11,01 | 4,22222<br>2 | 76    | 7,34424 | 4,0083  | 2,87046 | 111,000<br>7 | 1,03868 | 91,9958<br>9 | 161 | 80  | 35 | 54,5  | 21,0254<br>2 | 0,49689<br>4 | 0,21739<br>1 | 8,15933      | 0,36185<br>1 | 171,553<br>4 | 652,746<br>4 | 285,576<br>6 | 4,05432<br>5 | 1,77376<br>7 | 0 |
| 86.  | M | 56 | 6,94  | 4,83333<br>3 | 87    | 5,14614 | 2,50842 | 2,04294 | 79,0004<br>9 | 1,30964 | 115,994<br>8 | 170 | 102 | 42 | 83    | 28,7197<br>2 | 0,6          | 0,24705<br>9 | 8,52630<br>6 | 0,64105<br>7 | 244,873<br>2 | 869,683<br>3 | 358,104<br>9 | 5,11578<br>4 | 2,10649<br>9 | 0 |
| 87.  | F | 58 | 16,25 | 4,61111<br>1 | 83    | 5,87022 | 3,41352 | 2,0688  | 80,0005      | 0,84675 | 74,9966<br>5 | 164 | 107 | 39 | 81,5  | 30,3019      | 0,65243<br>9 | 0,23780<br>5 | 8,04313<br>7 | 0,40929<br>5 | 243,722<br>4 | 860,615<br>6 | 313,682<br>3 | 5,24765<br>6 | 1,91269<br>7 | 1 |
| 88.  | M | 66 | 3,54  | 4,5          | 81    | 4,5255  | 2,74116 | 1,00854 | 39,0002<br>4 | 1,70479 | 150,993<br>3 | 172 | 102 | 41 | 82,5  | 27,8867      | 0,59302<br>3 | 0,23837<br>2 | 8,71853<br>7 | 1,69035<br>4 | 243,131<br>2 | 889,290<br>8 | 357,46       | 5,17029<br>5 | 2,07825<br>6 | 0 |
| 89.  | F | 63 | 13,4  | 5,11111<br>1 | 92    | 5,19786 | 2,56014 | 2,22396 | 86,0005<br>3 | 0,91449 | 80,9963<br>8 | 158 | 85  | 36 | 63    | 25,2363<br>4 | 0,53797<br>5 | 0,22784<br>8 | 8,22304<br>6 | 0,41119<br>9 | 207,519<br>6 | 698,958<br>9 | 296,029<br>7 | 4,42379      | 1,87360<br>5 | 0 |
| 90.  | F | 70 | 16,68 | 5,16666<br>7 | 93    | 6,465   | 4,06002 | 2,0688  | 80,0005      | 0,76772 | 67,9969<br>6 | 155 | 86  | 34 | 58,5  | 24,3496<br>4 | 0,55483<br>9 | 0,21935<br>5 | 8,05891<br>5 | 0,37109<br>4 | 196,231<br>7 | 693,066<br>7 | 274,003<br>1 | 4,47139<br>8 | 1,76776<br>2 | 0 |
| 91.  | M | 32 | 5,77  | 3,94444<br>4 | 71    | 4,21518 | 1,91364 | 1,83606 | 71,0004<br>4 | 1,03868 | 91,9958<br>9 | 167 | 80  | 39 | 62    | 22,2309<br>9 | 0,47904<br>2 | 0,23353<br>3 | 8,09127<br>7 | 0,56571<br>1 | 179,877<br>1 | 647,302<br>1 | 315,559<br>8 | 3,87606<br>1 | 1,88958      | 0 |
| 92.  | F | 36 | 11,06 | 5,27777<br>8 | 95    | 4,31862 | 2,17224 | 1,34472 | 52,0003<br>2 | 1,73866 | 153,993<br>1 | 166 | 82  | 33 | 60    | 21,7738<br>4 | 0,49397<br>6 | 0,19879<br>5 | 8,89763<br>8 | 1,29295<br>3 | 193,735<br>8 | 729,606<br>3 | 293,622      | 4,39521<br>9 | 1,76880<br>7 | 0 |
| 93.  | M | 67 | 8,53  | 4,61111<br>1 | 83    | 4,70652 | 2,1981  | 1,8102  | 70,0004<br>3 | 1,51286 | 133,994      | 170 | 91  | 46 | 75,3  | 26,0553<br>6 | 0,53529<br>4 | 0,27058<br>8 | 8,62348<br>9 | 0,83574<br>2 | 224,688<br>1 | 784,737<br>5 | 396,680<br>5 | 4,61610<br>3 | 2,33341<br>5 | 0 |
| 94.  | F | 63 | 28,7  | 6,33333<br>3 | 114   | 8,32692 | 5,58576 | 2,01708 | 78,0004<br>8 | 1,59189 | 140,993<br>7 | 163 | 94  | 35 | 84    | 31,6157<br>9 | 0,57668<br>7 | 0,21472<br>4 | 8,99176<br>6 | 0,78920<br>5 | 284,281<br>8 | 845,226      | 314,711<br>8 | 5,18543<br>6 | 1,93074<br>7 | 1 |
| 95.  | F | 66 | 9,7   | 6,83333<br>3 | 123   | 4,73238 | 2,09466 | 2,30154 | 89,0005<br>5 | 0,71127 | 62,9971<br>8 | 154 | 85  | 29 | 59,8  | 25,2150<br>4 | 0,55194<br>8 | 0,18831<br>2 | 8,26212<br>7 | 0,30904<br>1 | 208,329<br>9 | 702,280<br>8 | 239,601<br>7 | 4,56026<br>5 | 1,55585<br>5 | 0 |
| 96.  | F | 65 | 106,5 | 4,88888<br>9 | 88    | 4,88754 | 2,74116 | 1,65504 | 64,0004      | 1,10642 | 97,9956<br>2 | 158 | 107 | 35 | 87,5  | 35,0504<br>7 | 0,67721<br>5 | 0,22151<br>9 | 8,36911<br>2 | 0,66851<br>6 | 293,341<br>3 | 895,495      | 292,918<br>9 | 5,66769      | 1,85391<br>7 | 1 |
| 97.  | M | 64 | 12,5  | 5,33333<br>3 | 96    | 5,92194 | 3,64626 | 1,6809  | 65,0004      | 1,30964 | 115,994<br>8 | 176 | 103 | 42 | 84,4  | 27,2469      | 0,58522<br>7 | 0,23863<br>6 | 8,62474<br>7 | 0,77913      | 234,997<br>6 | 888,348<br>9 | 362,239<br>4 | 5,04743<br>7 | 2,05817<br>8 | 0 |
| 98.  | F | 78 | 20,03 | 4,88888<br>9 | 88    | 3,7497  | 1,8102  | 1,47402 | 57,0003<br>5 | 1,02739 | 90,9959<br>3 | 165 | 100 | 43 | 75    | 27,5482<br>1 | 0,60606<br>1 | 0,26060<br>6 | 8,29500<br>4 | 0,69699<br>9 | 228,512<br>5 | 829,500<br>4 | 356,685<br>2 | 5,02727<br>5 | 2,16172<br>8 | 0 |
| 99.  | F | 64 | 34,55 | 4,83333<br>3 | 87    | 7,68042 | 4,03416 | 3,41352 | 132,000<br>8 | 0,54192 | 47,9978<br>5 | 164 | 93  | 35 | 87    | 32,3468<br>2 | 0,56707<br>3 | 0,21341<br>5 | 7,64391<br>7 | 0,15875<br>7 | 247,256<br>4 | 710,884<br>3 | 267,537<br>1 | 4,33466      | 1,63132<br>4 | 1 |
| 100. | F | 69 | 25,92 | 5,22222<br>2 | 94    | 3,64626 | 1,34472 | 1,88778 | 73,0004<br>5 | 0,91449 | 80,9963<br>8 | 158 | 100 | 37 | 72    | 28,8415<br>3 | 0,63291<br>1 | 0,23417<br>7 | 8,24455<br>2 | 0,48442<br>6 | 237,785<br>5 | 824,455<br>2 | 305,048<br>4 | 5,21807<br>1 | 1,93068<br>6 | 0 |
